# Supplementary material for: Cas9 interaction with the tracrRNA nexus modulates the repression of type II-A CRISPR-cas genes
Source: PubMed Central journal article supplement (PMC11417352; doi:10.1093/nar/gkae597), 2024-07-12
Supplement: gkae597_supplemental_file.pdf [file gkae597_supplemental_file.pdf]

**Cas9 interaction with the tracrRNA nexus modulates the repression of type II-A  
CRISPR-cas genes**

Hyejin Kim<sup>1,3</sup> and Luciano A. Marraffini<sup>1,2,\*</sup>

<sup>1</sup>Laboratory of Bacteriology, The Rockefeller University, 1230 York Ave, New York, NY  
10065, USA.

<sup>2</sup>Howard Hughes Medical Institute, The Rockefeller University, 1230 York Ave, New  
York, NY 10065, USA.

<sup>3</sup>Weill Cornell/Rockefeller/Sloan Kettering Tri-Institutional MD-PhD Program, New York,  
NY, USA.

\*Corresponding author: [marraffini@rockefeller.edu](mailto:marraffini@rockefeller.edu)

## SUPPLEMENTARY FIGURES

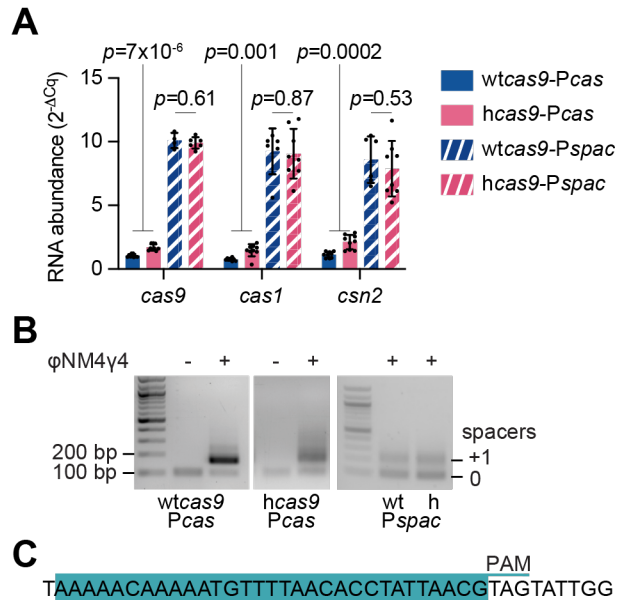

**Supplementary Figure 1. *cas* gene expression under the control of *Pspac* is similar for wild type Cas9 and hCas9. (A)** RNA quantification of *cas* gene transcripts via qRT-PCR normalized to housekeeping gene *rho*. Total RNA was isolated from early log phase *S. aureus* cultures harboring pCRISPR expressing wild-type Cas9 or hCas9 with *cas* gene expression under the control of native *Pcas* or constitutive *Pspac* promoters. Means of three biological replicates + SD are reported. **(B)** Agarose gel electrophoresis of PCR products obtained after amplification of the CRISPR array using DNA obtained from infections with  $\phi$ NM4y4 (MOI10) in Figure 1D. **(C)** Sequence of the  $\phi$ NM4y4 target used in Figure 1G, containing a NAG protospacer adjacent motif (PAM).

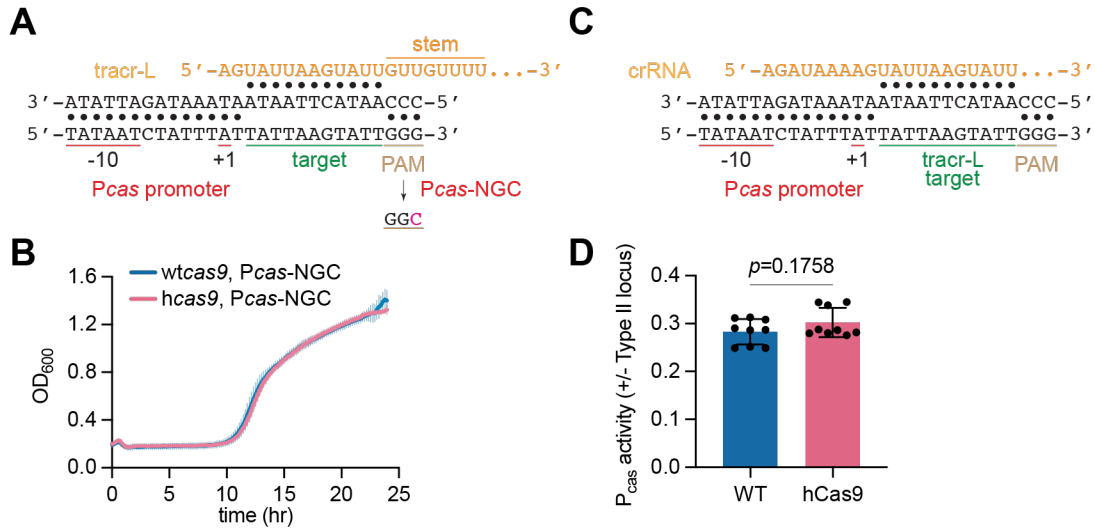

**Supplementary Figure 2. Mutation of the *Pcas* target PAM relieves *tracr-L*-mediated *cas* repression to enhance the type II-A response. (A)** Schematic of *tracr-L*-mediated repression of the *Pcas* promoter in *S. pyogenes*. Highlighted in green is the 11-nucleotide match between the 5' end of *tracr-L* and the *Pcas* promoter. The putative GGG PAM of the *Pcas* target was mutated to GGC. **(B)** Growth of *S. aureus* harboring a pCRISPR with a *Pcas* PAM mutation, GGC, upon infection with  $\phi$ NM4y4 (MOI ~10), measured as the OD<sub>600</sub> of the cultures over time. Mean of three biological replicates  $\pm$  SEM are reported. **(C)** Schematic of *tracr-S*/crRNA-mediated repression of the *Pcas* promoter in *S. pyogenes*. Highlighted in green is the 11-nucleotide match between the 5' end of crRNA and the *P<sub>cas</sub>* promoter. **(D)** *Pcas* promoter activity measured as the green fluorescence/OD<sub>600</sub> ratio in cells harboring a plasmid harboring a *Pcas-gfp* reporter and a second plasmid encoding pCRISPR with wild-type Cas9 or hCas9 in the presence of a deletion of the *tracr-L* promoter (only *tracr-S* is present in the cells). Promoter activity was normalized to an empty vector control. Means of five biological replicates (3 technical replicates each)  $\pm$  SD are reported.

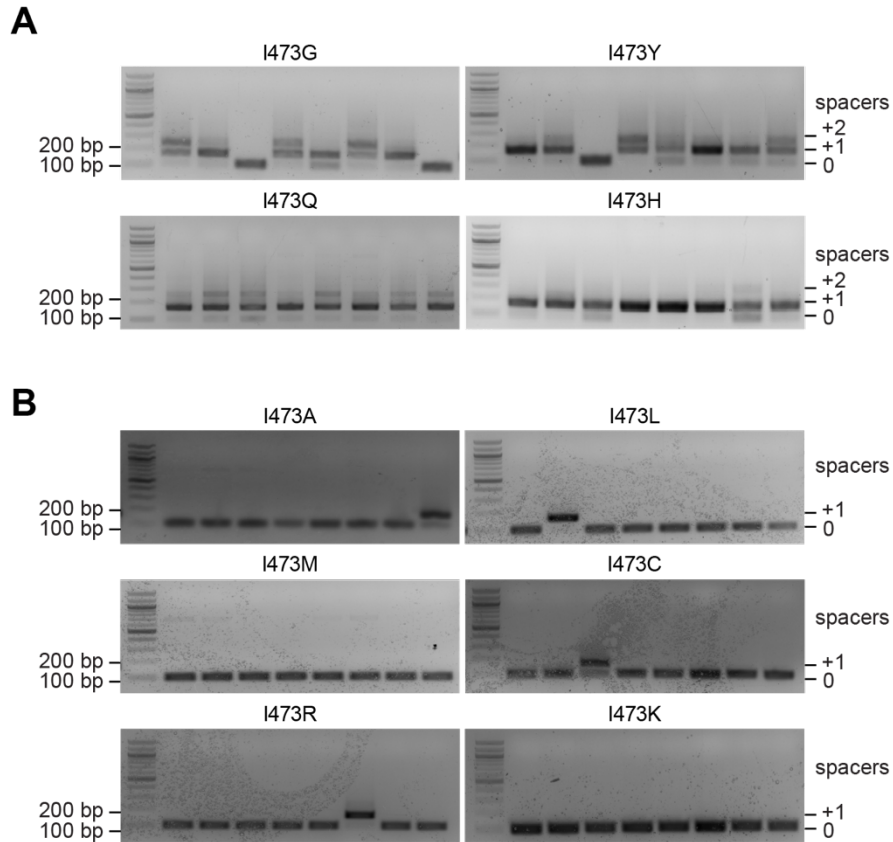

**Supplementary Figure 3. Mutations in Cas9 residue 473 can modulate Pcas repression. (A)** Agarose gel electrophoresis of PCR products obtained after amplification of the CRISPR array using DNA obtained from colonies formed on top agar, after infection with  $\phi$ NM4 $\gamma$ 4 (MOI~2), from the experiment shown in Figure 4A with I473 substitutions that enhance spacer acquisition. **(B)** Same as **(A)** but testing I473 substitutions that do not alter spacer acquisition frequency.

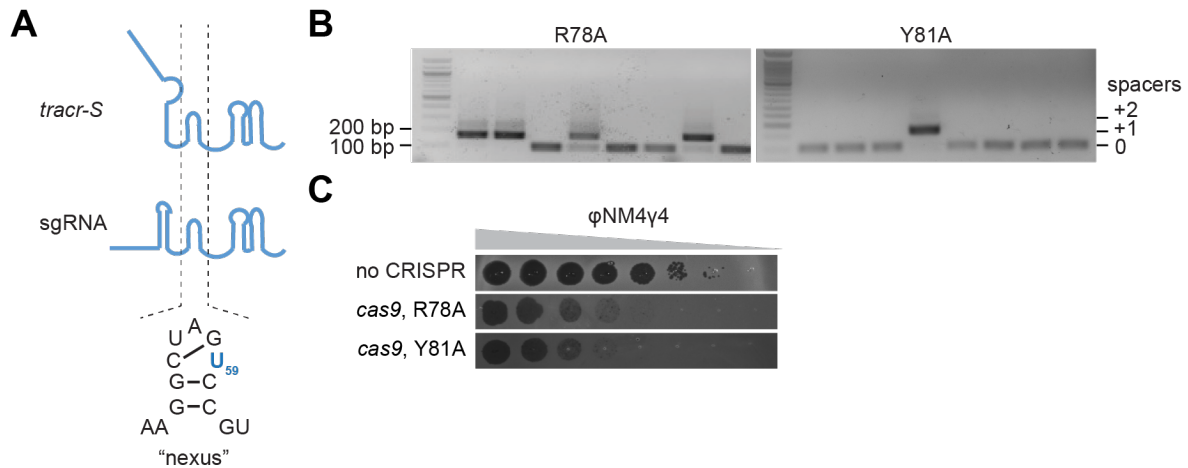

**Supplementary Figure 4. The Cas9 pocket interacting with tracrRNA nexus is important for Pcas repression. (A)** Schematic of the tracrRNA nexus shared by *tracr-S* and sgRNA. The highlighted U59 base of the tracrRNA nexus is predicted to interact with the Cas9 pocket displayed in Figure 3A. **(B)** Agarose gel electrophoresis of PCR products obtained after amplification of the CRISPR array using DNA obtained from colonies formed on top agar that express Cas9<sup>R78A</sup> or Cas9<sup>Y81A</sup>, after infection with  $\phi$ NM4 $\gamma$ 4 (MOI~2), from the experiment shown in Figure 5A. **(C)** Detection of plaque formation after spotting 10-fold serial dilutions of  $\phi$ NM4 $\gamma$ 4 phage on top agar seeded with *S. aureus* expressing Cas9<sup>R78A</sup> or Cas9<sup>Y81A</sup> or an empty vector control. Plasmids were programmed with a spacer in the CRISPR array to target a region of the viral genome followed by a NAG PAM. Representatives of three biological replicates shown.

**A**

|                    |     |                                                                                                                           |          |
|--------------------|-----|---------------------------------------------------------------------------------------------------------------------------|----------|
| <i>S. pyogenes</i> | 1   | MDKKYSIGLDIGTNSVGWAVITDEYKVPSSKFKVLGNTDRHSIKKNLIGALLFDSGETAEATRLKRTARRRYTRRNK                                             | IC       |
| <i>S. mutans</i>   | 1   | MKKPYSIGLDIGTNSVGWAVVDDYKVPKMKMVLGNTDKSHIKKNLLGALLFDSGNTAADRRLKRTARRRYTRRRN                                               | IIL      |
|                    |     | * * * * * : * * * * * : * * * * * : * * * * * : * * * * * : * * * * * : * * * * * : * * * * * : * * * * * : * * * * *     |          |
| <i>S. pyogenes</i> | 81  | YLQEIFSNEMAKVDDSFHRLVESFLVEEDKHERHPIFGNIVDEVAYHEKYPTIYHLRKKLVDSTDKADRLIYLALAH                                             |          |
| <i>S. mutans</i>   | 81  | YLQEIFAEMSKVDDSFHRLVETEDKRGHRHPIFGNLEEVKYHENFPTIYHLRQYLADNPEKVDLRLVYLALAH                                                 |          |
|                    |     | * * * * * : * * * * * : * * * * * : * * * * * : * * * * * : * * * * * : * * * * * : * * * * * : * * * * * : * * * * *     |          |
| <i>S. pyogenes</i> | 161 | MIKFRGHFLIEGDLNPDNSDVKLFQILVQTYNQLFEEENPINASGVDAKAILSARLSKSRRENLIQPLGEEKKNGLFGN                                           |          |
| <i>S. mutans</i>   | 161 | IIKFRGHFLIEGKFDTRNNDVQRLFQEFLLAVYDNTFENSSLQEQNQVVEEILTDKISKSAKDRVLKLPNEKSNGRFAE                                           |          |
|                    |     | : * * * * * : * * * * * : * * * * * : * * * * * : * * * * * : * * * * * : * * * * * : * * * * * : * * * * * : * * * * *   |          |
| <i>S. pyogenes</i> | 241 | LIALSLGLTPNFKSNFDLAEDAKLQLSKDYYDDLDNLLAQIGDQYADLFLAAKNLSDAILLSDILRVNTEITKAPLSAS                                           |          |
| <i>S. mutans</i>   | 241 | FLKLI VGNQADF KKHFELEEKAPLQFSKDYEEELVLLAQIGDNYAELFLSAKKLYDSILLSGILTVTDVSTKAPLSAS                                          |          |
|                    |     | : : * * * * * : * * * * * : * * * * * : * * * * * : * * * * * : * * * * * : * * * * * : * * * * * : * * * * * : * * * * * |          |
| <i>S. pyogenes</i> | 321 | MIKRYDEHHQDLTLLKALVRQQLPEKYKEIFFDQSKNGYAGYIDGGASQEEFYKFIKPILEKMDGTEELLVKLNREDLLR                                          |          |
| <i>S. mutans</i>   | 321 | MIQRYNEHQMDLAQLKQFIRQKLSDKYNEVFSVSKDGYAGYIDGKTNQEAFYKYLKGLLNKIEGSGYFLDKIEREDFLR                                           |          |
|                    |     | * * * * * : * * * * * : * * * * * : * * * * * : * * * * * : * * * * * : * * * * * : * * * * * : * * * * * : * * * * *     |          |
| <i>S. pyogenes</i> | 401 | KQRTFDNGSIPHQIHLGELHAILRRQEDFYPLFKDNREKIEKILTFRIPYYVGPLARGNSRFAMWTRKSEET                                                  | TPWNFEE  |
| <i>S. mutans</i>   | 401 | KQRTFDNGSIPHQIHLQEMRAIIRQAQEFYPLADNQDRIEKILTFRIPYYVGPLARGKSDFAWLSRKSADK                                                   | ITPWNFDE |
|                    |     | * * * * * : * * * * * : * * * * * : * * * * * : * * * * * : * * * * * : * * * * * : * * * * * : * * * * * : * * * * *     |          |
| <i>S. pyogenes</i> | 481 | VVDKGASQAQSFIERMTNFDKNLPNEKVLPKHSLLYEYFTVYNELTKVKYVTEGMRKPAFLSGEQKKAIVDLLFKTNRKVT                                         |          |
| <i>S. mutans</i>   | 481 | IVDKESAEAFINRMTNYDLYLPNQKVLPKHSLLYEKFTVYNELTKVKYKTEQ-GKTAFFDANMKQEIFDGVFKVYRKVT                                           |          |
|                    |     | : * * * * * : * * * * * : * * * * * : * * * * * : * * * * * : * * * * * : * * * * * : * * * * * : * * * * * : * * * * *   |          |
| <i>S. pyogenes</i> | 561 | VKQLKEDYFKKIECFDSVEISGVED--RFNASLGTYHDLKIKDKDFLDNEENEDILEDIVLTLTLFEDREMIEERLK                                             |          |
| <i>S. mutans</i>   | 560 | KDKLMDFLEKEFDEFRIVDLTGLDKENKAFNASYGTYHDLRKI--DKDFLDNSKNEKILEDIVLTLTLFEDREMIRKRL                                           |          |
|                    |     | : * * * * * : * * * * * : * * * * * : * * * * * : * * * * * : * * * * * : * * * * * : * * * * * : * * * * * : * * * * *   |          |
| <i>S. pyogenes</i> | 638 | TYAHLFDDKVMKQLKRRRYT                                                                                                      |          |
| <i>S. mutans</i>   | 638 | NYSDLLTKEQVKKLERRHYT                                                                                                      |          |
|                    |     | : * * * * * : * * * * * : * * * * * : * * * * * : * * * * * : * * * * * : * * * * * : * * * * * : * * * * * : * * * * *   |          |

**B**

stem

tracr-L 5'--UUCGGUGCUUUUUUUA--3'

3'--ATATTATGAATAAACGAAAAACGTCC--5'

5'--TATAACTACTTATTTGCTTTTTTGC AAGG--3'

-10      +1      target      PAM

Pcas promoter      ↓ Pcas-NGC

AGC

**C**

|                         |                                          |                    |                       |       |
|-------------------------|------------------------------------------|--------------------|-----------------------|-------|
|                         | -10                                      | +1                 | tracr-L target        | PAM   |
| <i>S. pyogenes</i> Pcas | ATT-TTGTGTTATAATCTATTTATT-ATTAAGTATTG--- | GGTAATATTTTTTGAA-- | GAGATATT              |       |
|                         | .....                                    | .....              | .....                 | ..... |
| <i>S. mutans</i> Pcas   | ATTATTG---TATAA--TACTTATGCTT---          | TTTTGCAAGG--       | ACATTTTTTCAAAGGACATTT |       |
|                         | .....                                    | .....              | .....                 | ..... |
|                         | -10                                      | +1                 | tracr-L target        | PAM   |

**D**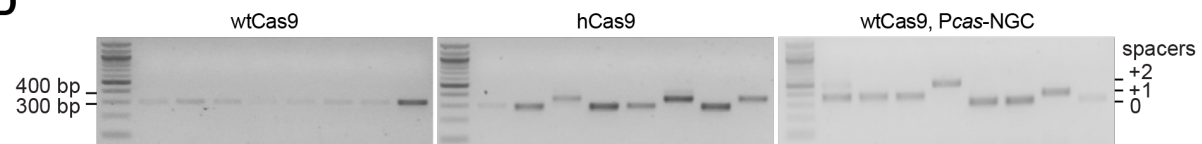

**Supplementary Figure 5. Cas9<sup>I473F</sup> enhances spacer acquisition in other type II-A systems that produce a *tracr-L* isoform. (A) TCOFFEE alignment of the Cas9 proteins encoded by *S. pyogenes* SF370 and *S. mutans* NN2025. Highlighted in red are the residues of interest that have been mutated in this study. (\*) indicates identical residues. (:) indicates strongly similar residues. (.) indicates weakly similar residues. (B)**

Schematic of *tracr-L*-mediated repression of the *Pcas* promoter in *S. mutans*. Highlighted in green is the 9-nucleotide match between the 3' end of *tracr-L* and the *Pcas* promoter. The putative AGG PAM of the *Pcas* target was mutated to AGC in Figure 6. **(C)** Alignment of the *Pcas* region of *S. pyogenes* and *S. mutans*. **(D)** Agarose gel electrophoresis of PCR products obtained after amplification of the CRISPR array using DNA obtained from colonies formed on top agar after infection with  $\phi$ NM4y4 (MOI~2), in the experiment described in Figure 6A.

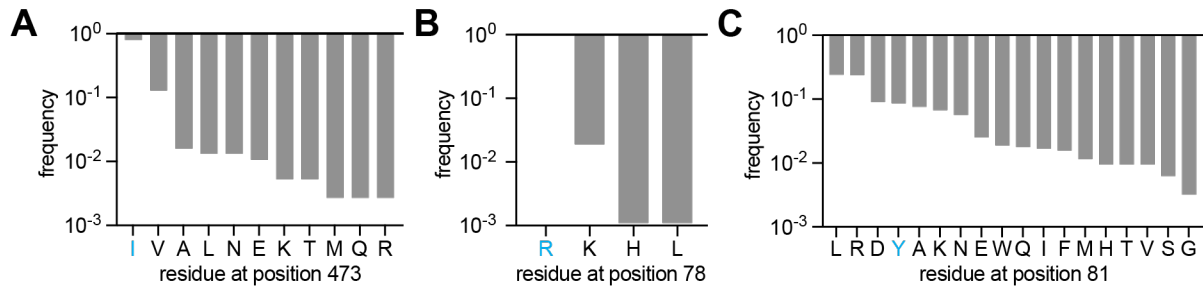

**Supplementary Figure 6. Alignment of 1,000 Cas9 protein sequences. (A)** Frequency of conservation of amino acid residues at position 473 of *S. pyogenes* SF370 Cas9 (the residue present in this protein is noted in blue). **(B)** Same as **(A)** but for position 78. **(C)** Same as **(A)** but for position 81.



## SUPPLEMENTARY TABLES

**Supplementary Table 1.** Plasmids used in this study.

| Plasmid | Description                                                   | Reference  |
|---------|---------------------------------------------------------------|------------|
| pC194   | Cloning vector                                                | (1)        |
| pE194   | Cloning vector                                                | (2)        |
| pLZ12   | Cloning vector                                                | (3)        |
| pDB114  | Cloning vector                                                | (4)        |
| pLG29   | <i>S. pyogenes</i> P <sub>cas</sub> -GFP reporter             | (5)        |
| pLG3    | <i>S. pyogenes</i> P <sub>tracr-L</sub> -GFP reporter         | (5)        |
| pGG32   | <i>S. pyogenes</i> pCRISPR with native array                  | (6)        |
| pRH065  | <i>S. pyogenes</i> pCRISPR targeting with spc65               | (7)        |
| pRH087  | <i>S. pyogenes</i> pCRISPR with 1 <sup>st</sup> native spacer | (7)        |
| pRH163  | hCas9 in GG32 backbone                                        | (7)        |
| pHK30   | pGG32 $\Delta$ tracr-L                                        | This study |
| pHK31   | pRH163 $\Delta$ tracr-L                                       | This study |
| pHK34   | hCas9 in RH087 backbone                                       | This study |
| pHK41   | 3xFLAG WT Cas9 in RH087 backbone                              | This study |
| pHK42   | 3xFLAG hCas9 in HK34 backbone                                 | This study |
| pHK58   | Mutated P <sub>cas</sub> PAM to NGC in pGG32                  | This study |
| pHK59   | Mutated P <sub>cas</sub> PAM to NGC in pRH163                 | This study |
| pHK78   | hCas9 in RH065 backbone                                       | This study |
| pHK132  | 3xFLAG WT Cas9 $\Delta$ tracr-L                               | This study |
| pHK133  | 3xFLAG hCas9 $\Delta$ tracr-L                                 | This study |
| pHK171  | GG32 with cas genes under control of P <sub>spac</sub>        | This study |
| pHK175  | RH163 with cas genes under control of P <sub>spac</sub>       | This study |
| pHK180  | RH065 $\Delta$ tracr-L                                        | This study |
| pHK181  | HK78 $\Delta$ tracr-L                                         | This study |
| pHK184  | <i>S. pyogenes</i> pCRISPR targeting with spc64               | This study |
| pHK185  | hCas9 in HK184 backbone                                       | This study |
| pHK191  | RH065 with Cas9 under control of P <sub>spac</sub>            | This study |
| pHK192  | HK78 with hCas9 under control of P <sub>spac</sub>            | This study |
| pHK211  | 3xFLAG Cas9 <sup>R78A</sup> in RH087 backbone                 | This study |
| pHK212  | 3xFLAG Cas9 <sup>Y81A</sup> in RH087 backbone                 | This study |

|        |                                                                                    |            |
|--------|------------------------------------------------------------------------------------|------------|
| pHK218 | Cas9 <sup>R78A</sup> in RH065 backbone                                             | This study |
| pHK219 | Cas9 <sup>Y81A</sup> in RH065 backbone                                             | This study |
| pJM75  | <i>S. mutans</i> pCRISPR in pC194                                                  | This study |
| pHK230 | <i>S. mutans</i> pCRISPR in LZ12                                                   | This study |
| pHK232 | <i>S. mutans</i> pCRISPR I473F in LZ12                                             | This study |
| pHK233 | <i>S. mutans</i> pCRISPR P <sub>cas-ngc</sub> in LZ12                              | This study |
| pHK323 | <i>S. mutans</i> P <sub>cas</sub> -GFP reporter in LZ12 with SpecR replaced by CmR | This study |

1. Horinouchi, S. and Weisblum, B. (1982) Nucleotide sequence and functional map of pC194, a plasmid that specifies inducible chloramphenicol resistance. *J. Bacteriol.*, **150**, 815-825.
2. Horinouchi, S. and Weisblum, B. (1982) Nucleotide sequence and functional map of pE194, a plasmid that specifies inducible resistance to macrolide, lincosamide, and streptogramin type B antibiotics. *J. Bacteriol.*, **150**, 804-814.
3. Perez-Casal, J., Caparon, M.G. and Scott, J.R. (1991) Mry, a trans-acting positive regulator of the M protein gene of *Streptococcus pyogenes* with similarity to the receptor proteins of two-component regulatory systems. *J. Bacteriol.*, **173**, 2617-2624.
4. Bikard, D., Euler, C.W., Jiang, W., Nussenzweig, P.M., Goldberg, G.W., Duportet, X., Fischetti, V.A. and Marraffini, L.A. (2014) Exploiting CRISPR-Cas nucleases to produce sequence-specific antimicrobials. *Nat. Biotechnol.*, **32**, 1146-1150.
5. Workman, R.E., Pammi, T., Nguyen, B.T.K., Graeff, L.W., Smith, E., Sebald, S.M., Stoltzfus, M.J., Euler, C.W. and Modell, J.W. (2021) A natural single-guide RNA repurposes Cas9 to autoregulate CRISPR-Cas expression. *Cell*, **184**, 675-688 e619.
6. Heler, R., Samai, P., Modell, J.W., Weiner, C., Goldberg, G.W., Bikard, D. and Marraffini, L.A. (2015) Cas9 specifies functional viral targets during CRISPR-Cas adaptation. *Nature*, **519**, 199-202.
7. Heler, R., Wright, A.V., Vucelja, M., Bikard, D., Doudna, J.A. and Marraffini, L.A. (2017) Mutations in Cas9 Enhance the Rate of Acquisition of Viral Spacer Sequences during the CRISPR-Cas Immune Response. *Mol. Cell*, **65**, 168-175.

**Supplementary Table 2.** Oligonucleotides used in this study.

| <b>Name</b> | <b>Sequence</b>                           | <b>Purpose</b> |
|-------------|-------------------------------------------|----------------|
| HK1         | GGAAGTCTGAAGAAACACTTACCCCATGGAATTT<br>TG  | Cas9 I473L     |
| HK2         | CAA AATTCCATGGGGTAAGTGTTTCTTCAGACTT<br>CC | Cas9 I473L     |
| HK3         | GGAAGTCTGAAGAAACAGTTACCCCATGGAATTT<br>TG  | Cas9 I473V     |
| HK4         | CAA AATTCCATGGGGTAACTGTTTCTTCAGACTT<br>CC | Cas9 I473V     |
| HK5         | GGAAGTCTGAAGAAACA ACTACCCCATGGAATTT<br>TG | Cas9 I473T     |
| HK6         | CAA AATTCCATGGGGTAGTTGTTTCTTCAGACTT<br>CC | Cas9 I473T     |
| HK7         | GGAAGTCTGAAGAAACAAATACCCCATGGAATTT<br>TG  | Cas9 I473N     |
| HK8         | CAA AATTCCATGGGGTATTTGTTTCTTCAGACTT<br>CC | Cas9 I473N     |
| HK9         | GGAAGTCTGAAGAAACAAGTACCCCATGGAATT<br>TTG  | Cas9 I473S     |
| HK10        | CAA AATTCCATGGGGTACTTGTTTCTTCAGACTT<br>CC | Cas9 I473S     |
| HK11        | GGAAGTCTGAAGAAACAAGACCCCATGGAATT<br>TTG   | Cas9 I473K     |
| HK12        | CAA AATTCCATGGGGTCTTTGTTTCTTCAGACTT<br>CC | Cas9 I473K     |
| HK13        | GGAAGTCTGAAGAAACAAGAACCCCATGGAATT<br>TTG  | Cas9 I473R     |
| HK14        | CAA AATTCCATGGGGTCTTGTTTCTTCAGACTT<br>CC  | Cas9 I473R     |
| HK15        | GGAAGTCTGAAGAAACATATACCCCATGGAATTT<br>TG  | Cas9 I473Y     |
| HK16        | CAA AATTCCATGGGGTATATGTTTCTTCAGACTT<br>CC | Cas9 I473Y     |
| HK17        | GGAAGTCTGAAGAAACATGTACCCCATGGAATTT<br>TG  | Cas9 I473C     |
| HK18        | CAA AATTCCATGGGGTACATGTTTCTTCAGACTT<br>CC | Cas9 I473C     |
| HK19        | GGAAGTCTGAAGAAACATGGACCCCATGGAATT<br>TTG  | Cas9 I473W     |
| HK20        | CAA AATTCCATGGGGTCCATGTTTCTTCAGACTT<br>CC | Cas9 I473W     |
| HK21        | GGAAGTCTGAAGAAACACCTACCCCATGGAATT<br>TTG  | Cas9 I473P     |

|       |                                                                                                    |                          |
|-------|----------------------------------------------------------------------------------------------------|--------------------------|
| HK22  | CAA AATTCCATGGGGTAGGTGTTTCTTCAGACTT<br>CC                                                          | Cas9 I473P               |
| HK23  | GGAAGTCTGAAGAAACACATACCCCATGGAATTT<br>TG                                                           | Cas9 I473H               |
| HK24  | CAA AATTCCATGGGGTATGTGTTTCTTCAGACTT<br>CC                                                          | Cas9 I473H               |
| HK25  | GGAAGTCTGAAGAAACACAAACCCCATGGAATT<br>TTG                                                           | Cas9 I473Q               |
| HK26  | CAA AATTCCATGGGGTTTTGTGTTTCTTCAGACTT<br>CC                                                         | Cas9 I473Q               |
| HK27  | GGAAGTCTGAAGAAACAGATACCCCATGGAATT<br>TTG                                                           | Cas9 I473D               |
| HK28  | CAA AATTCCATGGGGTATCTGTTTCTTCAGACTT<br>CC                                                          | Cas9 I473D               |
| HK29  | GGAAGTCTGAAGAAACAGAAACCCCATGGAATT<br>TTG                                                           | Cas9 I473E               |
| HK30  | CAA AATTCCATGGGGTTTTCTGTTTCTTCAGACTT<br>CC                                                         | Cas9 I473E               |
| HK31  | GGAAGTCTGAAGAAACAGGTACCCCATGGAATT<br>TTG                                                           | Cas9 I473G               |
| HK32  | CAA AATTCCATGGGGTACCTGTTTCTTCAGACTT<br>CC                                                          | Cas9 I473G               |
| HK33  | GGAAGTCTGAAGAAACAATGACCCCATGGAATT<br>TTG                                                           | Cas9 I473M               |
| HK34  | CAA AATTCCATGGGGTCATTGTTTCTTCAGACTT<br>CC                                                          | Cas9 I473M               |
| HK44  | GGAAGTCTGAAGAAACAGCTACCCCATGGAATT<br>TTG                                                           | Cas9 I473A               |
| HK45  | CAA AATTCCATGGGGTAGCTGTTTCTTCAGACTT<br>CC                                                          | Cas9 I473A               |
| HK38  | AGGATCATGATGGTGATTATAAAGATCACGACAT<br>CGATTACAAAGATGATGACGATAAAGATAAGAAA<br>TACTCAATAGGCTTAGATATCG | 3xFLAG Cas9              |
| HK39  | CGTGATCTTTATAATCACCATCATGATCCTTGTA<br>GTCCATTTTTGCCTCCTAAAAT                                       | 3xFLAG Cas9              |
| HK42  | CTTTCTCAAGTTATCATCGGCAATG                                                                          | <i>S. pyogenes</i> array |
| HK100 | AGTGCGATTACAAAATTTTTTAGAC                                                                          | <i>S. pyogenes</i> array |
| HK95  | TGCTGTTACTTTAAGACTTACAACAGAAG                                                                      | pE194 cloning            |
| HK96  | CTTCTGTTGTAAGTCTTAAAGTAACAGCA                                                                      | pE194 cloning            |
| HK105 | TATTAAGTATTGGCTAATATTTTTTTGAAGAGATAT<br>TTTG                                                       | P <sub>cas-NGC</sub>     |
| HK106 | CAA AATATCTCTTCAAAAAATATTAGCCAATACTT<br>AATA                                                       | P <sub>cas-NGC</sub>     |
| HK146 | TCTGACTTCCGAAAAGATTTCC                                                                             | qPCR (Cas9)              |
| HK147 | GCAGTTCCAACGACGGCA                                                                                 | qPCR (Cas9)              |

|       |                                                                                                 |                                  |
|-------|-------------------------------------------------------------------------------------------------|----------------------------------|
| HK148 | GAACCATTTAGGCCTTTAGTGG                                                                          | qPCR (Cas1)                      |
| HK149 | CATATCCTAAATTCAGGAACTCCTTTC                                                                     | qPCR (Cas1)                      |
| HK150 | CCATTAAGAGGCGGTACAATTC                                                                          | qPCR (Csn2)                      |
| HK151 | CCTCATATTGGTAACAATATTGCAC                                                                       | qPCR (Csn2)                      |
| HK159 | GCATCTGGTTTGTTCGTA CTGATTG                                                                      | qPCR (rho)                       |
| HK160 | CCAGATGAGCGTATTAATTAGAGACAG                                                                     | qPCR (rho)                       |
| HK161 | CTTTTATAACAAATAATCAAGGAGAAATTC                                                                  | qPCR (tracr-L)                   |
| HK162 | GTATTAAGTATTGTTTTATGGCTGATAAAT                                                                  | qPCR (tracr-L)                   |
| HK155 | GGTGCCACTTTTTCAAGTTGATAAC                                                                       | qPCR (tracr-S)                   |
| HK200 | TGGAACCATTCAAACAGCATAGCA                                                                        | qPCR (tracr-S)                   |
| HK165 | GTTTTAGAGCTATGCTGTTTTGAATG                                                                      | qPCR (crRNA)                     |
| HK166 | AAAAGCGCAAGAAGAAATCAAC                                                                          | qPCR (crRNA)                     |
| HK196 | TATTTGAACCAACAAACGACTTTTAGTATAACC                                                               | pC194 cloning                    |
| HK197 | GGTTATACTAAAAGTCGTTTGTGGTTCAAATA                                                                | pC194 cloning                    |
| HK233 | TTATTGCTTTTTTGC AAGCACATTTTTTCAAAGGA                                                            | <i>Smut</i> P <sub>cas-NGC</sub> |
| HK234 | TCCTTTGAAAAAATGTGCTTGCAAAAAAGCAATA<br>A                                                         | <i>Smut</i> P <sub>cas-NGC</sub> |
| HK249 | ATACACGTCGGAAGAATGCTATTTGTTATCTACA<br>GGAG                                                      | SpyCas9 R78A                     |
| HK250 | CTCCTGTAGATAACAAATAGCATTCTTCCGACGT<br>GTAT                                                      | SpyCas9 R78A                     |
| HK251 | ATACACGTCGGAAGAATCGTATTTGTGCTCTACA<br>GGAG                                                      | SpyCas9 Y81A                     |
| HK252 | CTCCTGTAGAGCACAAATACGATTCTTCCGACGT<br>GTAT                                                      | SpyCas9 Y81A                     |
| HK265 | TTTATCTACAAGGTGTGGCATAATGTGTGGAATT<br>GTGAGCGGATAACAATTGTAATATTTTTTGAAGA<br>GATATTTTGA AAAAGAAA | P <sub>spac-Cas</sub>            |
| HK266 | TGTTATCCGCTCACAATTCCACACATTATGCCAC<br>ACCTTGTAGATAAAGTCAAACACAAAATTCTTTTA<br>AAAAGTAGTTTATTTTG  | P <sub>spac-Cas</sub>            |
| HK275 | TTTTTAAAAGAATTTTGTGTTATAATCTATTTATTA<br>TTAAGTATTGGGT                                           | Δtracr-L                         |
| HK276 | TTATAACACAAAATTCTTTTAAAATGGCTGATAA<br>ATTTCTTTGAATTTCTCC                                        | Δtracr-L                         |
| HK286 | ATCGGCTGATAAATTTACACCATGGAAT                                                                    | SmCas9 I473F                     |
| HK287 | ATTCCATGGTGTAATTTATCAGCCGAT                                                                     | SmCas9 I473F                     |
| HK215 | GCTTTGGCACATATAATTAAGTTTAGAGG                                                                   | <i>Smut</i> qPCR (Cas9)          |
| HK220 | ATTCTTGAAACAGTCTTTGTACATCATTATTGC                                                               | <i>Smut</i> qPCR (Cas9)          |
| HK221 | GCTAAACAATCAGATTTCTTGGGCAG                                                                      | <i>Smut</i> qPCR (Cas1)          |
| HK222 | GAACATTCTCCCAAATAACATGACTGAT                                                                    | <i>Smut</i> qPCR (Cas1)          |
| HK225 | TGGTTCACGCTGATTTAGAAAATCAGT                                                                     | <i>Smut</i> qPCR (Csn2)          |

|       |                                                               |                                |
|-------|---------------------------------------------------------------|--------------------------------|
| HK226 | GCAATTAATTCCGTAATGGTATTTGCC                                   | <i>Smut</i> qPCR (Csn2)        |
| HK219 | AACAAGAAAAGCGCTAGAAAGATTGATTTCTA                              | <i>Smut</i> array              |
| HK347 | TGAGCGCAACGCAATTAA                                            | <i>Smut</i> array              |
| JM386 | AAAACCTACAGAAAACACTAAATTAATAAGAAAG<br>AGCCAAACCTCGAAAG        | <i>Smut</i> pCRISPR<br>cloning |
| JM389 | GGCTCTTTCTTATTAATTTAGTGTTTTCTGTAGGT<br>TTTTAGGCATAAACTATATG   | <i>Smut</i> pCRISPR<br>cloning |
| JM511 | GCTAGTAAACCGCCTCGCGCAGCTTTTAAAAG<br>CAAATATGAGCC              | <i>Smut</i> pCRISPR<br>cloning |
| JM512 | GGCTCATATTTGCTTTTTAAAAGCTGCGCGAGGC<br>GGTTTACTAGC             | <i>Smut</i> pCRISPR<br>cloning |
| HK391 | AAACACTAAATTAATAAGAAAGAGCCAAACC                               | <i>Smut</i> pCRISPR<br>cloning |
| HK392 | GCGCGAGGCGGTTTACTA                                            | <i>Smut</i> pCRISPR<br>cloning |
| HK393 | TGCCCGCTAGTAAACCGCCTCGCGCGGTCATAA<br>CCTGAAGGAAGATCTGG        | <i>Smut</i> pCRISPR<br>cloning |
| HK394 | GCTCTTTCTTATTAATTTAGTGTTTATCTGTGCCA<br>GTTTCGTAATGTCTG        | <i>Smut</i> pCRISPR<br>cloning |
| HK493 | TGTTTCCACCATTTTTTCAATTTTTCACTTTAGAT<br>AAAAATTTAGGAGGCATATCAA | LZ12 SpecR→CmR                 |
| HK494 | AAAAAATAACCTTATTGGTACTTACTTATAAAAGC<br>CAGTCATTAGGCCTATCT     | LZ12 SpecR→CmR                 |
| HK495 | GTAAGTACCAATAAGGTTATTTTTTAAATGTTTCC                           | LZ12 SpecR→CmR                 |
| HK496 | AAAAATTGAAAAAATGGTGGAACACTTTT                                 | LZ12 SpecR→CmR                 |
